1                   **Cadmium Exposure Increases the Risk of Juvenile Obesity:**

2                   **A Human and Zebrafish Comparative Study**

3           Adrian J. Green<sup>1</sup>, Cathrine Hoyo<sup>1,2</sup>, Carolyn J. Mattingly<sup>1,2</sup>, Yiwen Luo<sup>3</sup>, Jung-Ying Tzeng<sup>3</sup>,

4                                   Susan Murphy<sup>1</sup> and Antonio Planchart<sup>1,2</sup>

5

6           <sup>1</sup>Department of Biological Sciences and the <sup>2</sup>Center for Human Health and the Environment,

7                                   <sup>3</sup>Department of Statistics, North Carolina State University, Raleigh, NC 27695

8

9   Address correspondence to:

10   Antonio Planchart, PhD

11   Department of Biological Sciences

12   Campus Box 7633

13   NC State University

14   Raleigh, NC 27695-7633

15   Tel. (919) 513-2530

16   FAX: (919) 515-7169

17   Email: [ajplanch@ncsu.edu](mailto:ajplanch@ncsu.edu)

18

19   **CONFLICTS OF INTEREST**

20   Authors declare there are no competing financial interests in relation to the work described.

21 **OBJECTIVE:** Human obesity is a complex metabolic disorder disproportionately affecting  
22 people of lower socioeconomic strata, and ethnic minorities, especially African Americans and  
23 Hispanics. Although genetic predisposition and a positive energy balance are implicated in  
24 obesity, these factors alone do not account for the excess prevalence of obesity in lower  
25 socioeconomic populations. Therefore, environmental factors, including exposure to pesticides,  
26 heavy metals, and other contaminants, are agents widely suspected to have obesogenic  
27 activity, and they also are spatially correlated with lower socioeconomic status. Our study  
28 investigates the causal relationship between exposure to the heavy metal, cadmium (Cd), and  
29 obesity in a cohort of children and a zebrafish model of adipogenesis.

30 **DESIGN:** An extensive collection of first trimester maternal blood samples obtained as part of  
31 the Newborn Epigenetics Study (NEST) were analyzed for the presence Cd, and these results  
32 were cross analyzed with the weight-gain trajectory of the children through age five years. Next,  
33 the role of Cd as a potential obesogen was analyzed in an *in vivo* zebrafish model.

34 **RESULTS:** Our analysis indicates that the presence of Cd in maternal blood during pregnancy  
35 is associated with increased risk of juvenile obesity in the offspring, independent of other  
36 variables, including lead (Pb) and smoking status. Our results are recapitulated in a zebrafish  
37 model, in which exposure to Cd at levels approximating those observed in the NEST study is  
38 associated with increased adiposity.

39 **CONCLUSION:** Our findings identify Cd as potential human obesogen. Moreover, these  
40 observations are recapitulated in a zebrafish model, suggesting that the underlying mechanisms  
41 may be evolutionarily conserved, and that zebrafish may be a valuable model for uncovering  
42 pathways leading to Cd-mediated obesity in human populations.

## 43 INTRODUCTION

44 The prevalence of obesity has more than doubled among children and more than tripled  
45 among adolescents in the last 30 years<sup>1,2</sup>. While obesity prevalence has plateaued overall in  
46 the last two years, the disparities in the prevalence of obesity in children of lower socioeconomic  
47 status (SES) and racial/ethnic minorities appear to be widening<sup>3-5</sup>. Genetic predisposition and  
48 energy imbalance, where caloric input exceeds energy output, are implicated in obesity;  
49 however, these factors alone cannot explain the disproportionate incidence of obesity in lower  
50 SES populations. The increased use of organic and inorganic chemicals for a wide range of  
51 applications in the last century has been paralleled by increases in the body burden of  
52 environmental pollutants, many of them endocrine disruptors. In animal models, *in vitro* and in  
53 humans, many of these chemicals have been associated with lipid accumulation and  
54 progressive cardiometabolic dysfunction. However, these data have been difficult to interpret  
55 and use to recommend public action, as the specificity of the associations between many of  
56 these chemicals and the cardiometabolic disease risk phenotype has not been demonstrated,  
57 and the doses of exposure in model systems are often at or above human occupational levels.

58 Cadmium (Cd) is a ubiquitous environmental contaminant ranked seventh on the list of  
59 toxicants of concern by the Agency for Toxic Substances and Disease Registry (ATSDR)<sup>6</sup>. Two  
60 to three decades leading up to the 1970s saw a rapid increase in the use of Cd in the  
61 manufacture of fertilizer and nickel-cadmium batteries, that paralleled an increase in blood Cd  
62 concentrations in the US population<sup>7-10</sup>. Major sources of human exposure include ingestion of  
63 foods contaminated with Cd, cigarette smoke, and breathing contaminated air in occupational  
64 settings or in neighborhoods near contaminated industrial facilities. The mechanisms by which  
65 Cd elicits toxicity are not entirely clear, although induction of oxidative stress has been  
66 implicated. Understanding the connection between exposure and Cd-mediated outcomes may  
67 be further complicated by its long half-life, estimated to be between 10 and 45 years, in the

68 kidney, liver, lung and pancreas<sup>11,12</sup>. Cd is a known human carcinogen and is associated with  
69 respiratory, renal, neurological, and bone disorders. In addition, some studies<sup>13-15</sup>, including  
70 reviews<sup>12,16-18</sup>, but not others<sup>19,20</sup> link lower levels of Cd to cardiovascular and metabolic  
71 diseases; however, these associations are limited to adults.

72         Epidemiological and animal studies over the past 15 years have demonstrated that *in*  
73 *utero* and neonatal environmental exposures alter programming of endocrine systems involved  
74 in growth, energy metabolism, adipogenesis, appetite, and glucose-insulin homeostasis of the  
75 developing fetus<sup>21-25</sup>. Cd exposure has been associated with lower birth weight<sup>26-28</sup>, a  
76 phenomenon known to be a persistent risk factor for accelerated adiposity gain in young  
77 children, which has been linked to cardio-metabolic impairment in adulthood<sup>29-35</sup>. Exposures  
78 occurring during critical developmental windows have been shown to stably alter the function of  
79 target organ systems, and initiate processes that increase the risk of cardiometabolic diseases  
80 later in life<sup>29,36</sup>. Currently cohort data linking low-level prenatal Cd exposure to cardiometabolic  
81 outcomes are limited and derive from studies with short follow-up<sup>37-39</sup>. Thus, it remains unclear  
82 whether early indications of metabolic dysfunction that have been associated with  
83 developmental exposure to Cd persist into middle childhood or adulthood. Furthermore,  
84 because prenatal Cd exposure also disproportionately affects lower SES strata, disentangling  
85 the contributions of Cd from competing risk factors including physical activity, dietary patterns,  
86 and other non-chemical stressors, has thus far not been possible<sup>40</sup>. Additional models are  
87 needed to isolate the effects of early developmental exposure to Cd on metabolic indicators.

88         Zebrafish (*Danio rerio*) is a powerful model system for toxicological research<sup>41,42</sup>. Its  
89 genome is sequenced and its conservation with humans is facilitating mechanism-based  
90 understanding of chemical effects on diverse human conditions<sup>43</sup>. Its experimental strengths  
91 include its small size, high fecundity, availability of transgenic lines for live imaging of complex  
92 physiological processes, embryonic transparency, experimental tractability, and conserved but

93 simplified anatomy<sup>41,42</sup>. Zebrafish larvae and adults are semitransparent and offer unique  
94 opportunities to study the effects of environmental exposures on adipogenesis and metabolic  
95 function *in vivo*<sup>44</sup>. Adipose tissue is recognized as a dynamic endocrine organ that plays a  
96 critical role in regulating metabolic homeostasis<sup>45</sup>, in addition to storing excess fat. Adipose  
97 tissue is first detected in zebrafish at about two weeks post-fertilization, embryonic and early  
98 larval stages are sensitive to compounds that modulate fat metabolism<sup>44,46-48</sup>. The deposition  
99 and mobilization of lipid within zebrafish adipose tissue can be altered by nutritional  
100 manipulation, suggesting that energy storage functions of adipose tissue are conserved  
101 between zebrafish and mammals<sup>49</sup>. In addition, gene expression studies on unfractionated  
102 zebrafish adipose tissue show shared pathophysiologic pathways indicating that zebrafish  
103 studies involving adipogenesis and metabolic function may be directly translatable to  
104 humans<sup>49,50</sup>.

105 Here, we present human data linking prenatal Cd exposure to obesity in children at age  
106 five years, and demonstrate that this effect is recapitulated in juvenile zebrafish exposed to Cd  
107 during the larval stage. Despite the likely presence of confounders in the human data, our  
108 findings in zebrafish, in which the exposure profile is strictly controlled, demonstrate for the first  
109 time that Cd may be a human obesogen, and that prenatal human exposure to Cd likely initiates  
110 a cascade of molecular events leading to increased adiposity.

111

## 112 MATERIALS AND METHODS

113 **Study participants:** Study participants were pregnant women enrolled in the Newborn  
114 Epigenetic Study (NEST), a prospective cohort study of women and their offspring enrolled  
115 from 2009 to 2011 from six prenatal clinics in Durham County, North Carolina. Participant  
116 accrual procedures were previously described<sup>51,52</sup>. Briefly, inclusion criteria were: age 18 years

117 or older, pregnant, and intention to use one of two participating obstetric facilities in Durham  
118 County for delivery. Exclusions were: plans to relinquish custody of the index child, move states  
119 in the subsequent three years, or an established HIV infection. In the 18-months beginning April,  
120 2009, 2,548 women were approached and 1,700 consented (66.7% response rate). The present  
121 analyses are limited to the first 319 infant-mother pairs in whom we measured first trimester  
122 blood Cd, arsenic (As) and lead (Pb). Maternal race, smoking status, BMI before pregnancy,  
123 parity, delivery route, and education were comparable in the 319 infant-mother pairs included in  
124 this study and the remainder of the cohort ( $p>0.05$ ). The study protocol was approved by the  
125 Duke University Institutional Review Board.

126

127 **Data and specimen collection:** Participants completed a self- or interviewer-administered  
128 questionnaire at the time of enrollment that included social and demographic characteristics,  
129 reproductive history, lifestyle factors, and anthropometric measurements. At study enrollment,  
130 maternal peripheral blood samples were collected; the mean gestational age at maternal blood  
131 draw was 12 weeks. Blood aliquots were prepared and stored at  $-80^{\circ}\text{C}$ .

132

133 **Measurement of cadmium:** Prenatal Cd blood levels were measured in whole blood as  
134 nanograms per gram (ng/g;  $1000\text{ng/g}=1035\text{ng}/\mu\text{l}$ ) using well-established solution-based ICP-MS  
135 methods<sup>53-56</sup>. Procedures were described previously<sup>26</sup>. Briefly, frozen maternal blood samples  
136 were equilibrated at room temperature, homogenized with a laboratory slow shaker  
137 (GlobalSpec, East Greenbrush, NY) and  $\sim 0.2$  mL aliquots were pipetted into a trace-metal-clean  
138 test tube and verified gravimetrically to  $\pm 0.001\text{mg}$  using a calibrated mass balance. Samples  
139 were spiked with internal standards consisting of known quantities (10 and 1 ng/g, respectively)  
140 of indium (In) and bismuth (Bi) (SCP Science, USA), used to correct for instrument drift. The  
141 solutions were then diluted using water purified to 18.2 M $\Omega$ /cm resistance, hereinafter referred

142 to as Milli-Q water (Millipore, Bedford, Mass., USA) and acidified using ultra-pure 12.4 mol/L  
143 hydrochloric acid to result in a final concentration of 2% hydrochloric acid (by volume). All  
144 standards, including aliquots of the certified NIST 955c, and procedural blanks were prepared  
145 by the same process.

146 Cd concentrations were measured using a Perkin Elmer DRC II (Dynamic Reaction Cell)  
147 axial field ICP-MS at the University of Massachusetts-Boston<sup>53-56</sup>. To clean sample lines and  
148 reduce memory effects, sample lines were sequentially washed using Milli-Q water for 90  
149 seconds and a 2% nitric acid solution for 120 seconds between analyses. Procedural blanks  
150 were analyzed within each block of 10 samples, to monitor and correct for instrument and  
151 procedural backgrounds. Calibration standards used to determine metal in blood included  
152 aliquots of Milli-Q water, and NIST 955c SRM spiked with known quantities of each metal in a  
153 linear range from 0.025 to 10 ng/g. Standards were prepared from 1000 mg/L single element  
154 standards ( SCP Science, USA). Method detection limits (MDLs) were calculated according to  
155 the two-step approach using the  $t_{99}S_{LLMV}$  method (USEPA, 1993) at 99% CI ( $t=3.71$ ). The MDLs  
156 yielded values of 0.006, 0.005, and 0.071  $\mu\text{g/dL}$ , for Cd, Pb, and As, respectively. Limits of  
157 detection (LOD) were 0.002, 0.002, and 0.022  $\mu\text{g/dL}$ , for Cd, Pb and As, respectively, and limits  
158 of quantification (LOQ) (according to Long and Winefordner, 1983) were 0.0007, 0.0006, and  
159 0.0073  $\mu\text{g/dL}$  for Cd, Pb, and As, respectively. The number of samples below the LOD for Cd,  
160 Pb, and As were 2, 2, and 1, respectively.

161

162 **Statistical analyses:** Childhood obesity at age five was defined by the weight-for-height z score  
163 (WHZ)<sup>57</sup>. Children with WHZ scores greater than 85% of their same sex peers at age five were  
164 classified as overweight/obese. Logistic regression was implemented to evaluate the  
165 association between childhood obesity and the concentration of Cd, adjusting for other co-  
166 occurring metals (Pb and As) in maternal blood, maternal smoking (never, quit during

167 pregnancy, pregnant smoker), breastfeeding (over three months or less), and sex of child. To  
168 reduce bias related to episodic growth acceleration, we additionally adjusted for child weight  
169 trajectory from birth to 36 months. These growth trajectories were computed as growth curves  
170 for each child, and functional principal component analysis (FPCA) was implemented to  
171 summarize growth curves. In the final model the top two FPCs, which explain 95% of the  
172 variability in the original growth curves were included as covariates in the regression model.  
173 Similar to PCA (which aims to extract orthogonal PCs that retain maximal amount of variation in  
174 the original variables by estimating the eigenvalues and eigenvectors of the sample variance-  
175 covariance matrix), FPCA aims to obtain orthogonal functional PCs that retain the maximal  
176 amount of variation in the original weight curves by estimating the eigenvalues and  
177 eigenfunctions of the sample variance-covariance function.

178

179 ***Zebrafish husbandry and embryo collection:*** Wildtype (AB) zebrafish were maintained in a  
180 zebrafish facility at NC State University according to standard protocols,<sup>58</sup> and in conformity with  
181 guidelines of the NC State Animal Care and Use Committee (ACUC), which also approved all  
182 animal experiments reported.. Briefly, adults were maintained at 28.5° C and a 14/10-hour  
183 light/dark cycle, and fed a standard diet twice daily. Spawning took place at a ratio of three  
184 females to one male; embryos were collected every 30 minutes and scored for viability prior to  
185 use in downstream applications.

186

187 ***Radioassay to assess cadmium uptake by larval zebrafish:*** To assess total body  
188 concentrations of Cd in zebrafish, triplicate groups of zebrafish embryos (n=25/group) were  
189 exposed from four hours post-fertilization (hpf) to seven days post-fertilization (dpf) to 60 µg/L of  
190 Cd in the form of CdCl<sub>2</sub> in 0.5x embryo media (E2), spiked with <sup>109</sup>Cd as a tracer (1592 Bq µg<sup>-1</sup>).  
191 Solutions were replaced daily during the course of the experiment. Larval uptake of Cd was



192 monitored daily beginning at three dpf by measuring radioactive decay corrected for background  
193 activity. Briefly, larvae were washed three times with five ml of Cd-free, non-radioactive 0.5x E2  
194 media followed by transfer to clean scintillation vials in two mL of the final wash. An additional  
195 two mL of the final wash were transferred to a second clean scintillation vial to measure  
196 background activity. The radioactivity uptake was measured using a Wallac Wizard 1480  
197 Gamma counter.

198

199 **Cadmium exposure:** Stock solutions of CdCl<sub>2</sub> ([Cd], 99.99% purity; Sigma-Aldrich, MO) were  
200 made at 60 parts per million (1000x), in Milli-Q water. Zebrafish embryos were collected as  
201 described and exposed to 60 parts per billion (ppb) Cd in 0.5X embryo media<sup>58</sup> from four hpf to  
202 seven dpf at a density of 10 embryos/mL with daily replacement, and fed beginning at five dpf.  
203 After removal of Cd, larvae were raised for lipid content analysis at one and two months post-  
204 fertilization.

205

206 **Lipid analysis:** The vital dye, Nile red, was used to stain lipids in juvenile zebrafish (one and  
207 two months post-fertilization), which allows repeated analysis of the same individual to assess  
208 amount and location of lipid droplets over time<sup>49</sup>. A 1.25 mg/mL stock solution was made in Milli-  
209 Q water. Immediately before use, a working solution was made by diluting 10 µL of the stock  
210 solution into 25 mL of aquarium system water to provide a final concentration of 0.5 µg/mL. Live  
211 zebrafish were stained in the dark for 30 minutes at 28°C<sup>44,49</sup>. Fish were removed from the Nile  
212 red solution and anesthetized in aquarium system water containing 0.25 mg/mL phosphate  
213 buffered (pH 7) Tricaine-S (Western Chemical, Ferndale, WA).

214

215 **Imaging and quantitative analysis:** Nile red-stained zebrafish were imaged using a Leica MZ  
216 FLIII fluorescence stereomicroscope. Images were analyzed using Fiji<sup>59</sup>. Color thresholding was  
217 used to select Nile red-containing sections by setting the hue value at 20-50. Background  
218 fluorescence was removed by setting a minimum brightness threshold of 120. Remaining  
219 fluorescence was selected and analyzed using the measure tool<sup>44,60,61</sup>. To account for  
220 differences in body size, fluorescence was normalized by taking the ratio of fluorescence to the  
221 dorsal-ventral height at the point where the anal fin attaches anteriorly to the body<sup>62</sup>.

222

## 223 RESULTS

224 **Study subjects:** The distributions of first trimester blood Cd concentrations were compared by  
225 social and demographic characteristics of the mother-child pairs (Table 1). African Americans  
226 comprised 35% of the study population while Whites, Hispanics and Others comprised 30%,  
227 32% and 4%, respectively. Nearly two thirds were younger than 30 years; approximately half  
228 had at least a high school education level, and reported a household income of at least \$25,000  
229 per year. Seventy-three percent were married or living with a partner. Fifteen percent of mothers  
230 reported smoking during pregnancy and 55% were overweight, obese, or extremely obese  
231 (29%, 15%, or 11% respectively). The majority of offspring (89%) had a birth weight within  
232 normal range (2.5 to 4 kg) and 88% were born at term. Blood Cd and Pb concentrations did not  
233 vary by maternal age, obesity, gestational age at delivery, or by sex and birth weight of  
234 offspring. However, blood levels of these heavy metals were higher among infants born to  
235 African Americans, Asians and Hispanics compared to Whites ( $p=0.03$ ), smokers ( $p=0.01$ ), and  
236 those who were obese before pregnancy ( $p=0.02$ ). These factors were considered as potential  
237 confounders.

238

239 **Associations between first trimester cadmium and obesity:** Maternal first trimester blood  
240 Cd concentrations were 0.3 ng/g of blood weight (IQR0.1-0.7), i.e. 0.03 $\mu$ g/dL, which is  
241 comparable to the US population<sup>63</sup>. Higher prenatal Cd levels were associated with higher  
242 obesity risk at five years of age (Table 2). The effect of Cd ( $\beta$ =3.211, se=1.33, p=0.03)  
243 corresponds to a ~25-fold increase in obesity odds at age five for every one ng/g increase in  
244 blood weight of Cd. These analyses were adjusted for sex, cigarette smoking, exposure to Pb  
245 and As, and the first two functional principal components of growth trajectories. Figure 1 also  
246 shows the increase in the magnitude of the adjusted associations between first trimester Cd  
247 exposure and obesity at each month with increasing age, until 30 months when it plateaus,  
248 indicating that Cd-associated obesity is likely sustained, at least in childhood. Additional  
249 adjustment for pre-pregnancy obesity did not alter these associations.

250

251 **Cadmium uptake by larval zebrafish:** Larval zebrafish began to accumulate measurable  
252 amounts of Cd from three dpf onward (Figure 2). The delay in Cd uptake correlated with the  
253 presence of the chorion, an embryonic membrane surrounding the developing embryo that  
254 typically ruptures at or about 48 hpf. Beginning at three dpf, Cd accumulation was approximately  
255 linear, and at seven dpf the total body burden of Cd reached 0.54 ng  $\pm$  0.1 ng/larvae. On  
256 average, a seven dpf larval zebrafish weighs 1.4 mg (Hu et al., 2000); by extrapolation, this  
257 equates to 386 ng Cd per gram of larvae. Since Cd burden is commonly reported as a serum  
258 concentration, we used the Cd toxicokinetic model proposed by Kjellström and Nordberg<sup>64</sup> to  
259 estimate a larval serum concentration. This model estimates that 0.06% of the total body burden  
260 of Cd can be found in the serum; therefore, the calculated serum concentration per larvae is  
261 0.23 ng/g, in agreement with the values observed in the NEST cohort.

262

263 ***Cadmium-induced juvenile lipid accumulation:*** Zebrafish undergo rapid development, with  
264 free-feeding larvae emerging after five dpf. However, a prolonged juvenile period of  
265 approximately three months follows, resulting in sexually mature adults at about 3-3.5 months  
266 post-fertilization. Zebrafish exposed to 60 ppb Cd during embryonic/larval development had  
267 significantly increased lipid accumulation at one and two months post-fertilization as seen in  
268 size-adjusted Nile red fluorescence following exposure from four hpf to one week post-  
269 fertilization (Figure 3,  $p < 0.05$ ). This increase in Nile red fluorescence was not seen at 3.5  
270 months post-fertilization (data not shown) at which point the Nile red fluorescence was  
271 significantly decreased in the Cd-exposed group vs controls ( $p < 0.01$ ). These data indicate that  
272 limited (developmental) exposure to Cd results in increased lipid accumulation in juvenile  
273 zebrafish, which persists throughout the pre- and peri-pubertal stages but likely reverses at or  
274 before the onset of sexual maturity in the absence of continuous exposure.

275

## 276 **DISCUSSION**

277 Although genetic predisposition and energy imbalance, where energy input exceeds  
278 output, are established risk factors fueling the obesity epidemic in children, caloric excess and  
279 physical inactivity alone fail to fully account for the magnitude and the steep trajectory followed  
280 by the obesity epidemic<sup>65</sup>. A growing consensus suggests that exposure to some lipophilic or  
281 metalloid contaminants is obesogenic; the most studied are persistent organic compounds such  
282 as polychlorinated bisphenyls<sup>66</sup>, and metalloids such as arsenic<sup>67-70</sup>. However, the obesogenic  
283 potential of ubiquitous inorganic metals, including Cd, is unclear.

284 We evaluated associations between prenatal Cd exposure and obesity in children, and  
285 determined the plausibility of this relationship in a controlled experimental zebrafish model. After  
286 adjusting for cigarette smoking, sex, breastfeeding and co-occurring metals (Pb and/or As), we

287 found persistent associations between prenatal Cd exposure and increased risk of obesity from  
288 birth to age five years. Our data also suggest that these children were also more likely to have  
289 steeper growth trajectories between birth to age five years. In support of this association, we  
290 also found that zebrafish exposed developmentally to Cd exhibited similar concentrations as  
291 those found in humans at similar developmental stages. Furthermore, these fish went on to  
292 exhibit significantly higher lipid accumulation as juveniles, when compared to unexposed  
293 controls. Surprisingly, lipid accumulation plateaued at or near the onset of sexual maturity.  
294 Although similar data observations are suggested in human data, follow-up is short and sample  
295 sizes small as evidenced by the wide confidence intervals. However, if similar plateauing of  
296 obesity risk were replicated in larger studies, these findings would support the intriguing  
297 possibility that, without postnatal exposure, Cd-associated obesity may in fact be transient.

298 To our knowledge, our study represents the first direct measure of association between  
299 prenatal Cd exposure and increased obesity risk in children, the results of which are supported  
300 by similar findings in an evolutionarily related model organism. Whether Cd is measured in  
301 biological materials that reflect long term chronic exposure, such as toe nails or urine or in  
302 blood, reflecting shorter term, concurrent exposure, data linking elevated Cd levels to obesity  
303 related cardiometabolic diseases among adults are inconsistent<sup>13-15, 12,16-18, 19,20</sup>. However, in  
304 early life, exposure to Cd is consistently associated with lower birth weight<sup>26,27,71-73</sup>, although the  
305 few studies that have examined the association between prenatal Cd and growth<sup>73</sup> found that  
306 maternal Cd was associated with lower head circumference, height and weight. Reasons for  
307 inconsistent findings are unclear although differences in exposure dose, i.e., circulating  
308 concentration, could be a factor, which may depend on the source of exposure. Cd doses that  
309 are ingested or inhaled from contaminated air or dust are likely higher than levels in  
310 contaminated grains, which form only a fraction of the total diet. Inconsistent findings could also  
311 be due to co-exposure to other metals, which together with Cd, may have antagonistic effects,

312 e.g., selenium. Differences could also be due to inadequate control for confounding by  
313 socioeconomic status, which in turn may influence not only dietary factors but also residing in  
314 geographic locations of higher exposure<sup>74</sup>. In zebrafish exposed only to Cd, limited to the  
315 human-equivalent periconceptional and early prenatal period and the elimination of  
316 socioeconomic effects, Cd exposure was associated with lipid accumulation. Whether the  
317 plateauing effect is sustained into puberty and beyond is still unknown.

318         Mechanisms linking low dose Cd exposure and subclinical cardiometabolic dysfunction  
319 are unclear; however, single metal analysis in adults suggests that blood Cd below reportable  
320 levels of 0.5 µg/dL was associated with elevated glucose<sup>75-79</sup>, higher blood pressure,  
321 presumably via kidney dysfunction<sup>80,81</sup>, and oxidative stress<sup>82</sup>, which depletes antioxidants<sup>83,84</sup>.  
322 In autopsy specimens, higher liver Cd levels were associated with hypertension<sup>85</sup>. In mice and  
323 *in vitro*, early Cd exposure increased inflammation, oxidative stress, and blood pressure,  
324 doubled adipocyte numbers<sup>86</sup>, and lowered the expression of lipid synthesis genes<sup>87</sup>; thus  
325 obesity could result *directly* from this increased capacity for lipid storage. In these model  
326 systems, early Cd exposure also dysregulated the release of chemokines, leptin and  
327 adiponectin<sup>86,87</sup> leading to insulin resistance later in life<sup>88</sup>. As these chemokines are involved in  
328 appetite regulation and energy expenditure<sup>89-91</sup>, cardiometabolic dysfunction indicators may also  
329 result *indirectly* via altered satiety responsiveness and increased caloric intake. Disentangling  
330 these possibilities will be critical in the future, to guide intervention efforts aimed at reducing Cd-  
331 related cardiometabolic dysfunction.

332         A major strength of our study is the ability to demonstrate in humans and in zebrafish  
333 that Cd increases lipid accumulation, leading to obesity, and associations are free from the  
334 influence of co-exposure to other metals and socioeconomic factors. However, our study had a  
335 limited sample size as evidenced by the wide confidence bands. While the sample size was  
336 adequate to demonstrate significant associations in overall analyses, we were under-powered to

337 examine sex differences in children; Cd exposure effects may vary by sex. In addition, although  
338 prospective, children were followed from birth to age five years, and without serial specimens,  
339 the effects of postnatal exposure could not be disentangled in children. However, zebrafish that  
340 were exposed only “prenatally” had significantly higher lipid accumulation than the unexposed  
341 controls, suggesting that postnatal exposure did not unduly influence our findings in children.  
342 Moreover, the extent to which Cd-related obesity will be maintained after age five years is  
343 unknown. Zebrafish that were followed until sexual maturity exhibited reduced lipid  
344 accumulation.

345         Despite these limitations, our data support the causal association between *in utero*  
346 exposure to Cd and obesity at age five years. Larger studies are required to confirm these  
347 findings and determine Cd effects vary by sex.

348

#### 349 **ACKNOWLEDGEMENTS**

350 We thank participants of the NEST project. We also acknowledge Stacy Murray, Kennetra Irby,  
351 Siobhan Greene and Anna Tsent for recruiting NEST participants, Carole Grenier and Erin  
352 Erginer for technical assistance, Dr. David Buchwalter for assistance with the Cd uptake assay,  
353 Carson Lunsford for assistance with the zebrafish lipid assay, and David C. Cole for zebrafish  
354 husbandry. AJG was supported by the Ruth L. Kirschstein National Research Service Award  
355 Institutional Training grant number T32ES007046. This publication was supported in part by NIH  
356 under award numbers P30ES025128 (CH, CJM, AP) and R01ES016772 (CH), and by a  
357 generous donation from Howard and Julia Clark.

358 **REFERENCES**

- 359 1. Ogden CL, Carroll MD, Kit BK, Flegal KM. Prevalence of childhood and adult obesity in  
360 the United States, 2011-2012. *Jama*. 2014;311(8):806-814.
- 361 2. National Center for Health Statistics. *Health, United States, 2011: With Special Features*  
362 *on Socioeconomic Status and Health*. Hyattsville, MD: U.S. Department of Health and  
363 Human Services;2012.
- 364 3. Claire Wang Y, Gortmaker SL, Taveras EM. Trends and racial/ethnic disparities in  
365 severe obesity among US children and adolescents, 1976-2006. *Int J Pediatr Obes*.  
366 2011;6(1):12-20. doi: 10.3109/17477161003587774. Epub 17477161003582010 Mar  
367 17477161003587717.
- 368 4. Ogden CL, Carroll MD, Kit BK, Flegal KM. Prevalence of obesity and trends in body  
369 mass index among US children and adolescents, 1999-2010. *JAMA*. 2012;307(5):483-  
370 490. doi: 10.1001/jama.2012.1040. Epub 2012 Jan 10 17.
- 371 5. Olds T, Maher C, Zumin S, et al. Evidence that the prevalence of childhood overweight  
372 is plateauing: data from nine countries. *Int J Pediatr Obes*. 2011;6(5-6):342-360. doi:  
373 10.3109/17477166.17472011.17605895. Epub 17472011 Aug 17 17477112.
- 374 6. ATSDR. Agency for Toxic Substances and Disease Registry. *The ATSDR 2011*  
375 *Substance Priority List 2011*; <http://www.atsdr.cdc.gov/>. Accessed 28 February, 2014.
- 376 7. Albin M, Skerfving S. [Pollutant levels at home and in food--low but dangerous].  
377 *Lakartidningen*. 2007;104(48):3659-3663.
- 378 8. Bergdahl IA. Another fundamental error in "What is the meaning of non-linear dose-  
379 response relationships between blood lead concentrations and IQ?" became obvious in  
380 the authors' response to comments. *Neurotoxicology*. 2007;28(3):705-706; author reply  
381 706.



- 382 9. Dietrich KN, Berger OG, Succop PA, Hammond PB, Bornschein RL. The developmental  
383 consequences of low to moderate prenatal and postnatal lead exposure: intellectual  
384 attainment in the Cincinnati Lead Study Cohort following school entry. *Neurotoxicology*  
385 *and teratology*. 1993;15(1):37-44.
- 386 10. Elliott P, Arnold R, Cockings S, et al. Risk of mortality, cancer incidence, and stroke in a  
387 population potentially exposed to cadmium. *Occup Environ Med*. 2000;57(2):94-97.
- 388 11. Lamas GA, Navas-Acien A, Mark DB, Lee KL. Heavy Metals, Cardiovascular Disease,  
389 and the Unexpected Benefits of Chelation Therapy. *J Am Coll Cardiol*.  
390 2016;67(20):2411-2418.
- 391 12. Solenkova NV, Newman JD, Berger JS, Thurston G, Hochman JS, Lamas GA. Metal  
392 pollutants and cardiovascular disease: mechanisms and consequences of exposure.  
393 *American heart journal*. 2014;168(6):812-822.
- 394 13. Li XT, Yu PF, Gao Y, et al. Association between Plasma Metal Levels and Diabetes  
395 Risk: a Case-control Study in China. *Biomedical and environmental sciences : BES*.  
396 2017;30(7):482-491.
- 397 14. Tinkov AA, Filippini T, Ajsuvakova OP, et al. The role of cadmium in obesity and  
398 diabetes. *The Science of the total environment*. 2017;601-602:741-755.
- 399 15. Asgary S, Movahedian A, Keshvari M, Taleghani M, Sahebkar A, Sarrafzadegan N.  
400 Serum levels of lead, mercury and cadmium in relation to coronary artery disease in the  
401 elderly: A cross-sectional study. *Chemosphere*. 2017;180:540-544.
- 402 16. Pruss-Ustun A, Vickers C, Haefliger P, Bertollini R. Knowns and unknowns on burden of  
403 disease due to chemicals: a systematic review. *Environmental health : a global access*  
404 *science source*. 2011;10:9.
- 405 17. Pruss-Ustun A, Bonjour S, Corvalan C. The impact of the environment on health by  
406 country: a meta-synthesis. *Environmental health : a global access science source*.  
407 2008;7:7.

- 408 18. Cosselman KE, Navas-Acien A, Kaufman JD. Environmental factors in cardiovascular  
409 disease. *Nat Rev Cardiol.* 2015;12(11):627-642.
- 410 19. Barregard L, Bergstrom G, Fagerberg B. Cadmium exposure in relation to insulin  
411 production, insulin sensitivity and type 2 diabetes: a cross-sectional and prospective  
412 study in women. *Environ Res.* 2013;121:104-109.
- 413 20. Borne Y, Fagerberg B, Persson M, et al. Cadmium exposure and incidence of diabetes  
414 mellitus--results from the Malmo Diet and Cancer study. *PLoS One.*  
415 2014;9(11):e112277.
- 416 21. Krauss-Etschmann S, Bush A, Bellusci S, et al. Of flies, mice and men: a systematic  
417 approach to understanding the early life origins of chronic lung disease. *Thorax.*  
418 2013;68(4):380-384.
- 419 22. Gluckman P, Hanson M, Beedle A. Early life events and their consequences for later  
420 disease: A life history and evolutionary perspective. *Am J Hum Biol.* 2007;19(1-19).
- 421 23. Lin X, Lim IY, Wu Y, et al. Developmental pathways to adiposity begin before birth and  
422 are influenced by genotype, prenatal environment and epigenome. *BMC medicine.*  
423 2017;15(1):50.
- 424 24. Tomar AS, Tallapragada DS, Nongmaithem SS, Shrestha S, Yajnik CS, Chandak GR.  
425 Intrauterine Programming of Diabetes and Adiposity. *Current obesity reports.*  
426 2015;4(4):418-428.
- 427 25. Dearden L, Ozanne SE. Early life origins of metabolic disease: Developmental  
428 programming of hypothalamic pathways controlling energy homeostasis. *Frontiers in*  
429 *neuroendocrinology.* 2015;39:3-16.
- 430 26. Vidal AC, Semenova V, Darrah T, et al. Maternal cadmium, iron and zinc levels, DNA  
431 methylation and birth weight. *BMC Pharmacol Toxicol.* 2015;16(1):20.

- 432 27. Johnston JE, Valentiner E, Maxson P, Miranda ML, Fry RC. Maternal cadmium levels  
433 during pregnancy associated with lower birth weight in infants in a North Carolina cohort.  
434 *PLoS One*. 2014;9(10):e109661.
- 435 28. Everson TM, Armstrong DA, Jackson BP, Green BB, Karagas MR, Marsit CJ. Maternal  
436 cadmium, placental PCDHAC1, and fetal development. *Reproductive toxicology*  
437 (*Elmsford, N.Y.* 2016;65:263-271.
- 438 29. Barker DJ. Developmental origins of adult health and disease. *J Epidemiol Community*  
439 *Health*. 2004;58(2):114-115.
- 440 30. Whincup PH, Kaye SJ, Owen CG, et al. Birth weight and risk of type 2 diabetes: a  
441 systematic review. *Jama*. 2008;300(24):2886-2897.
- 442 31. Ezzahir N, Alberti C, Deghmoun S, et al. Time course of catch-up in adiposity influences  
443 adult anthropometry in individuals who were born small for gestational age. *Pediatric*  
444 *research*. 2005;58(2):243-247.
- 445 32. Meas T, Deghmoun S, Armoogum P, Alberti C, Levy-Marchal C. Consequences of being  
446 born small for gestational age on body composition: an 8-year follow-up study. *The*  
447 *Journal of clinical endocrinology and metabolism*. 2008;93(10):3804-3809.
- 448 33. Howe LD, Tilling K, Benfield L, et al. Changes in ponderal index and body mass index  
449 across childhood and their associations with fat mass and cardiovascular risk factors at  
450 age 15. *PloS one*. 2010;5(12):e15186.
- 451 34. Anderson EL, Howe LD, Fraser A, et al. Weight trajectories through infancy and  
452 childhood and risk of non-alcoholic fatty liver disease in adolescence: the ALSPAC  
453 study. *Journal of hepatology*. 2014;61(3):626-632.
- 454 35. de Kroon ML, Renders CM, van Wouwe JP, van Buuren S, Hirasing RA. The Terneuzen  
455 Birth Cohort: BMI change between 2 and 6 years is most predictive of adult  
456 cardiometabolic risk. *PloS one*. 2010;5(11):e13966.

- 457 36. Barker DJ. The developmental origins of adult disease. *J Am Coll Nutr.* 2004;23(6  
458 Suppl):588S-595S.
- 459 37. Nye MD KK, Darrah TH, Maguire RL, Jima DD, Huang Z, Mendez MA, Fry RC, Jirtle RL,  
460 Murphy SK, Hoyo C. Maternal Blood Lead Concentrations, DNA Methylation of MEG3  
461 DMR Imprinted Domain and Early Growth in a Multiethnic Cohort. *Environmental*  
462 *Epigenomics.* 2016;in press.
- 463 38. Cassidy-Bushrow AE, Havstad S, Basu N, et al. Detectable Blood Lead Level and Body  
464 Size in Early Childhood. *Biol Trace Elem Res.* 2016;171(1):41-47.
- 465 39. Kim R, Hu H, Rotnitzky A, Bellinger D, Needleman H. A longitudinal study of chronic  
466 lead exposure and physical growth in Boston children. *Environmental health*  
467 *perspectives.* 1995;103(10):952-957.
- 468 40. Tyrrell J, Melzer D, Henley W, Galloway TS, Osborne NJ. Associations between  
469 socioeconomic status and environmental toxicant concentrations in adults in the USA:  
470 NHANES 2001-2010. *Environment international.* 2013;59:328-335.
- 471 41. Cheng KC, Hinton DE, Mattingly CJ, Planchart A. Aquatic models, genomics and  
472 chemical risk management. *Comparative biochemistry and physiology. Toxicology &*  
473 *pharmacology : CBP.* 2012;155(1):169-173.
- 474 42. Planchart A, Mattingly CJ, Allen D, et al. Advancing toxicology research using in vivo  
475 high throughput toxicology with small fish models. *ALTEX.* 2016.
- 476 43. Planchart A, Mattingly CJ, Allen D, et al. Advancing toxicology research using in vivo  
477 high throughput toxicology with small fish models. *Altex.* 2016;33(4):435-452.
- 478 44. Tingaud-Sequeira A, Ouadah N, Babin PJ. Zebrafish obesogenic test: a tool for  
479 screening molecules that target adiposity. *Journal of lipid research.* 2011;52(9):1765-  
480 1772.
- 481 45. Coelho M, Oliveira T, Fernandes R. Biochemistry of adipose tissue: an endocrine organ.  
482 *Archives of medical science : AMS.* 2013;9(2):191-200.

- 483 46. Jones KS, Alimov AP, Rilo HL, Jandacek RJ, Woollett LA, Penberthy WT. A high  
484 throughput live transparent animal bioassay to identify non-toxic small molecules or  
485 genes that regulate vertebrate fat metabolism for obesity drug development. *Nutrition &*  
486 *metabolism*. 2008;5:23.
- 487 47. Imrie D, Sadler KC. White adipose tissue development in zebrafish is regulated by both  
488 developmental time and fish size. *Developmental dynamics : an official publication of the*  
489 *American Association of Anatomists*. 2010;239(11):3013-3023.
- 490 48. Elo B, Villano CM, Govorko D, White LA. Larval zebrafish as a model for glucose  
491 metabolism: expression of phosphoenolpyruvate carboxykinase as a marker for  
492 exposure to anti-diabetic compounds. *Journal of molecular endocrinology*.  
493 2007;38(4):433-440.
- 494 49. Minchin JE, Rawls JF. In vivo analysis of white adipose tissue in zebrafish. *Methods in*  
495 *cell biology*. 2011;105:63-86.
- 496 50. Seth A, Stemple DL, Barroso I. The emerging use of zebrafish to model metabolic  
497 disease. *Dis Model Mech*. 2013;6(5):1080-1088.
- 498 51. Liu Y, Murphy SK, Murtha AP, et al. Depression in pregnancy, infant birth weight and  
499 DNA methylation of imprint regulatory elements. *Epigenetics*. 2012;7(7):735-746.
- 500 52. Vidal AC, Murphy SK, Murtha AP, et al. Associations between antibiotic exposure during  
501 pregnancy, birth weight and aberrant methylation at imprinted genes among offspring.  
502 *International journal of obesity (2005)*. 2013.
- 503 53. Darrah TH, Prutsman-Pfeiffer JJ, Poreda RJ, Ellen Campbell M, Hauschka PV,  
504 Hannigan RE. Incorporation of excess gadolinium into human bone from medical  
505 contrast agents. *Metallomics*. 2009;1(6):479-488.
- 506 54. DeLoid G, Cohen JM, Darrah T, et al. Estimating the effective density of engineered  
507 nanomaterials for in vitro dosimetry. *Nat Commun*. 2014;5:3514.

- 508 55. McLaughlin MP, Darrah TH, Holland PL. Palladium(II) and platinum(II) bind strongly to  
509 an engineered blue copper protein. *Inorg Chem.* 2011;50(22):11294-11296.
- 510 56. Sprauten M, Darrah TH, Peterson DR, et al. Impact of long-term serum platinum  
511 concentrations on neuro- and ototoxicity in Cisplatin-treated survivors of testicular  
512 cancer. *J Clin Oncol.* 2012;30(3):300-307.
- 513 57. Kuczumski RJ, Ogden CL, Guo SS, et al. 2000 CDC Growth Charts for the United  
514 States: methods and development. *Vital and health statistics. Series 11, Data from the*  
515 *national health survey.* 2002(246):1-190.
- 516 58. Westerfield M. The Zebrafish Book. A Guide for the Laboratory Use of Zebrafish (*Danio*  
517 *Reio*). 2000;4th ed. Eugene: Univ. of Oregon Press.
- 518 59. Schindelin J, Arganda-Carreras I, Frise E, et al. Fiji: an open-source platform for  
519 biological-image analysis. *Nature methods.* 2012;9(7):676-682.
- 520 60. Jensen EC. Quantitative analysis of histological staining and fluorescence using ImageJ.  
521 *Anatomical record (Hoboken, N.J. : 2007).* 2013;296(3):378-381.
- 522 61. Raldua D, Babin PJ. Simple, rapid zebrafish larva bioassay for assessing the potential of  
523 chemical pollutants and drugs to disrupt thyroid gland function. *Environ Sci Technol.*  
524 2009;43(17):6844-6850.
- 525 62. Parichy DM, Elizondo MR, Mills MG, Gordon TN, Engeszer RE. Normal table of  
526 postembryonic zebrafish development: staging by externally visible anatomy of the living  
527 fish. *Developmental dynamics : an official publication of the American Association of*  
528 *Anatomists.* 2009;238(12):2975-3015.
- 529 63. Luo Y, McCullough LE, Tzeng JY, et al. Maternal blood cadmium, lead and arsenic  
530 levels, nutrient combinations, and offspring birthweight. *BMC Public Health.*  
531 2017;17(1):354.
- 532 64. Kjellstrom T, Nordberg GF. A kinetic model of cadmium metabolism in the human being.  
533 *Environ Res.* 1978;16(1-3):248-269.

- 534 65. Heindel JJ, Vandenberg LN. Developmental origins of health and disease: a paradigm  
535 for understanding disease cause and prevention. *Curr Opin Pediatr.* 2015;27(2):248-  
536 253.
- 537 66. Heindel JJ, Newbold R, Schug TT. Endocrine disruptors and obesity. *Nature reviews.*  
538 *Endocrinology.* 2015;11(11):653-661.
- 539 67. Agay-Shay K, Martinez D, Valvi D, et al. Exposure to Endocrine-Disrupting Chemicals  
540 during Pregnancy and Weight at 7 Years of Age: A Multi-pollutant Approach.  
541 *Environmental health perspectives.* 2015;123(10):1030-1037.
- 542 68. Lin HC, Huang YK, Shiue HS, et al. Arsenic methylation capacity and obesity are  
543 associated with insulin resistance in obese children and adolescents. *Food and chemical*  
544 *toxicology : an international journal published for the British Industrial Biological*  
545 *Research Association.* 2014;74:60-67.
- 546 69. Rodriguez-Hernandez A, Camacho M, Henriquez-Hernandez LA, et al. Assessment of  
547 human health hazards associated with the dietary exposure to organic and inorganic  
548 contaminants through the consumption of fishery products in Spain. *The Science of the*  
549 *total environment.* 2016;557-558:808-818.
- 550 70. Su CT, Lin HC, Choy CS, Huang YK, Huang SR, Hsueh YM. The relationship between  
551 obesity, insulin and arsenic methylation capability in Taiwan adolescents. *The Science of*  
552 *the total environment.* 2012;414:152-158.
- 553 71. Menai M, Heude B, Slama R, et al. Association between maternal blood cadmium during  
554 pregnancy and birth weight and the risk of fetal growth restriction: the EDEN mother-  
555 child cohort study. *Reproductive toxicology (Elmsford, N.Y.* 2012;34(4):622-627.
- 556 72. Kippler M, Tofail F, Gardner R, et al. Maternal cadmium exposure during pregnancy and  
557 size at birth: a prospective cohort study. *Environmental health perspectives.*  
558 2012;120(2):284-289.

- 559 73. Lin CM, Doyle P, Wang D, Hwang YH, Chen PC. Does prenatal cadmium exposure  
560 affect fetal and child growth? *Occup Environ Med.* 2011;68(9):641-646.
- 561 74. King KE, Darrah TH, Money E, et al. Geographic clustering of elevated blood heavy  
562 metal levels in pregnant women. *BMC Public Health.* 2015;15(1):1035.
- 563 75. Gallagher CM, Meliker JR. Blood and urine cadmium, blood pressure, and hypertension:  
564 a systematic review and meta-analysis. *Environmental health perspectives.*  
565 2010;118(12):1676-1684.
- 566 76. Wallia A, Allen NB, Badon S, El Muayed M. Association between urinary cadmium levels  
567 and prediabetes in the NHANES 2005-2010 population. *International journal of hygiene  
568 and environmental health.* 2014;217(8):854-860.
- 569 77. Tellez-Plaza M, Jones MR, Dominguez-Lucas A, Guallar E, Navas-Acien A. Cadmium  
570 exposure and clinical cardiovascular disease: a systematic review. *Current  
571 atherosclerosis reports.* 2013;15(10):356.
- 572 78. Kuo CC, Moon K, Thayer KA, Navas-Acien A. Environmental chemicals and type 2  
573 diabetes: an updated systematic review of the epidemiologic evidence. *Current diabetes  
574 reports.* 2013;13(6):831-849.
- 575 79. Schober SE, Mirel LB, Graubard BI, Brody DJ, Flegal KM. Blood lead levels and death  
576 from all causes, cardiovascular disease, and cancer: results from the NHANES III  
577 mortality study. *Environmental health perspectives.* 2006;114(10):1538-1541.
- 578 80. Huang M, Choi SJ, Kim DW, et al. Evaluation of factors associated with cadmium  
579 exposure and kidney function in the general population. *Environ Toxicol.*  
580 2013;28(10):563-570.
- 581 81. Liang Y, Lei L, Nilsson J, et al. Renal function after reduction in cadmium exposure: an  
582 8-year follow-up of residents in cadmium-polluted areas. *Environmental health  
583 perspectives.* 2012;120(2):223-228.



- 584 82. Messner B, Turkcan A, Ploner C, Laufer G, Bernhard D. Cadmium overkill: autophagy,  
585 apoptosis and necrosis signalling in endothelial cells exposed to cadmium. *Cell Mol Life*  
586 *Sci.* 2016;73(8):1699-1713.
- 587 83. Li KG, Chen JT, Bai SS, et al. Intracellular oxidative stress and cadmium ions release  
588 induce cytotoxicity of unmodified cadmium sulfide quantum dots. *Toxicol In Vitro.*  
589 2009;23(6):1007-1013.
- 590 84. Stohs SJ, Bagchi D. Oxidative mechanisms in the toxicity of metal ions. *Free Radic Biol*  
591 *Med.* 1995;18(2):321-336.
- 592 85. Baker JR, Satarug S, Urbenjapol S, et al. Associations between human liver and kidney  
593 cadmium content and immunochemically detected CYP4A11 apoprotein. *Biochemical*  
594 *pharmacology.* 2002;63(4):693-696.
- 595 86. Beier EE, Maher JR, Sheu TJ, et al. Heavy metal lead exposure, osteoporotic-like  
596 phenotype in an animal model, and depression of Wnt signaling. *Environmental health*  
597 *perspectives.* 2013;121(1):97-104.
- 598 87. Kawakami T, Sugimoto H, Furuichi R, et al. Cadmium reduces adipocyte size and  
599 expression levels of adiponectin and Peg1/Mest in adipose tissue. *Toxicology.*  
600 2010;267(1-3):20-26.
- 601 88. Faulk C, Barks A, Sanchez BN, et al. Perinatal Lead (Pb) Exposure Results in Sex-  
602 Specific Effects on Food Intake, Fat, Weight, and Insulin Response across the Murine  
603 Life-Course. *PLoS One.* 2014;9(8):e104273.
- 604 89. Ilikuni N, Lam QL, Lu L, Matarese G, La Cava A. Leptin and Inflammation. *Curr Immunol*  
605 *Rev.* 2008;4(2):70-79.
- 606 90. La Cava A, Matarese G. The weight of leptin in immunity. *Nat Rev Immunol.*  
607 2004;4(5):371-379.
- 608 91. Matarese G, La Cava A. The intricate interface between immune system and  
609 metabolism. *Trends Immunol.* 2004;25(4):193-200.

610 **Table 1. Description of characteristics for study participants**

| Category                               |                                         | N   | Cadmium (ng/g)<br>quantile: median<br>[IQR*] | Lead (ng/g)<br>quantile: median<br>[IQR*] |
|----------------------------------------|-----------------------------------------|-----|----------------------------------------------|-------------------------------------------|
| <b>Maternal age<br/>(in years)</b>     | <30                                     | 182 | 0.1 [0, 0.2]                                 | 1.6 [0, 3.5]                              |
|                                        | 30<35                                   | 76  | 0.1 [0, 0.2]                                 | 1.5 [0.5, 2.8]                            |
|                                        | 35+                                     | 56  | 0.1 [0, 0.1]                                 | 2.0 [0.4, 5]                              |
| <b>Maternal<br/>educational levels</b> | Less than high school<br>or high school | 162 | 0.1 [0, 0.3]                                 | 2.1 [0, 4.1]                              |
|                                        | College                                 | 151 | 0.1 [0, 0.1]                                 | 1.4 [0.4, 2.9]                            |
|                                        | <b>Graduate degree</b>                  | 1   | 0.2 [0.2, 0.2]                               | 1.7 [1.7, 1.7]                            |
| <b>Ethnic composition</b>              | White                                   | 96  | 0.1 [0, 0.1]                                 | 1.3 [0.4, 2.4]                            |
|                                        | Black                                   | 108 | 0.1 [0, 0.3]                                 | 1.6 [0, 3.3]                              |
|                                        | Hispanic                                | 98  | 0.1 [0, 0.2]                                 | 2.2 [0, 4.9]                              |
|                                        | Other                                   | 12  | 0.1 [0, 0.2]                                 | 2.7 [0.7, 5.3]                            |
| <b>Cigarette smoking</b>               | Never Smoked                            | 228 | 0.1 [0, 0.2]                                 | 1.5 [0.4, 3.5]                            |
|                                        | Smoking during<br>pregnancy             | 46  | 0.3 [0, 0.4]                                 | 1.7 [0, 3.2]                              |
|                                        | Smoking prior to<br>pregnancy only      | 40  | 0.1 [0, 0.2]                                 | 1.7 [0, 2.6]                              |

611

612 \*\*IQR: interquartile range

613

614

615 **Table 2. Adjusted regression coefficients for associations between cadmium exposure**  
616 **and obesity parameters, in children at age 4-5 years\*.**

| <b>Parameter</b>                                          | <b>Regression Coefficient</b> | <b>Std. Error</b> | <b>p-value</b> |
|-----------------------------------------------------------|-------------------------------|-------------------|----------------|
| Intercept                                                 | 3.97                          | 2.78              | 0.395          |
| Functional principal components for growth trajectories** | 1.22                          | 0.42              | 0.004          |
| Functional principal components for growth trajectories   | 1.40                          | 1.50              | 0.353          |
| Prenatal blood Cd concentrations                          | 2.91                          | 1.34              | 0.030          |
| Prenatal As concentrations                                | -13.80                        | 7.47              | 0.065          |

617 \*Model adjusted for Pb concentrations, sex, breastfeeding for at least 3 months.

618 \*\*Functional principal components summarize growth trajectories from birth to age 3 years and are  
619 mutually exclusive.

620

621 **FIGURE LEGENDS**

622 **Figure 1. Effect of weight trajectory (via the first FPC) on obesity risk at age five.** The solid  
623 line indicates the effect of child weight by month via the first FPC on obesity risk at age five; the  
624 flanking dashed lines represent the 95% simultaneous confidence band of the weight effect,  
625 accounting for multiple comparisons of all months; the dotted line indicates zero effects. The  
626 simultaneous confidence band lies above zero, indicating a significant, positive effect of child  
627 weight on obesity risk at age five. The solid line also suggests that the magnitude of the weight  
628 effect increases over time.

629

630 **Figure 2. Total cadmium uptake during zebrafish development.** Total internal Cd was  
631 measured as described after zebrafish embryos were exposed continuously from four hpf to  
632 seven dpf to Cd spiked with  $^{109}\text{Cd}$ . Measurements began at three dpf after hatching from the  
633 chorion, which provides a significant barrier to Cd uptake. Measurements are mean $\pm$ SEM.

634

635 **Figure 3. Developmental exposure to cadmium increases lipid deposition in juvenile**  
636 **zebrafish.** Nile red fluorescence was significantly greater in zebrafish larvae exposed to 60 ppb  
637 vs. water controls at one (A) and two (B) months post-fertilization ( $p < 0.05$ ). Representative live  
638 images of Nile red staining are shown for control (C, D) and Cd-exposed (E, F) zebrafish at one-  
639 and two-months post-fertilization, respectively.

1 Figure 1

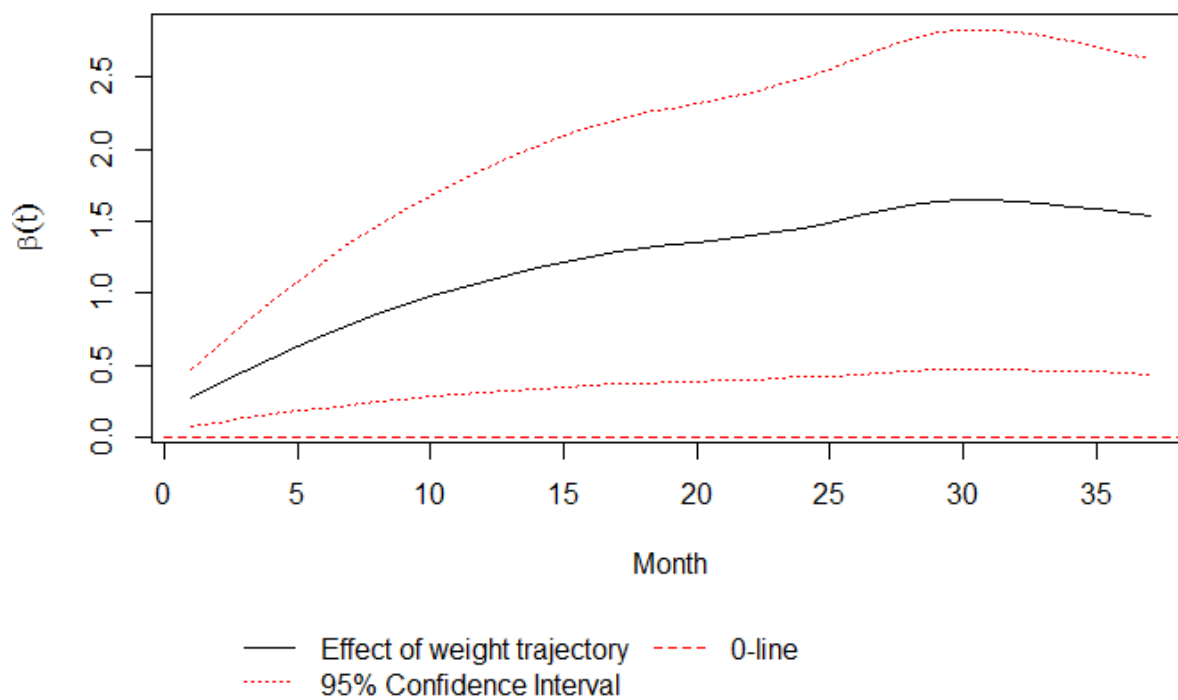

2

3 Figure 2

4

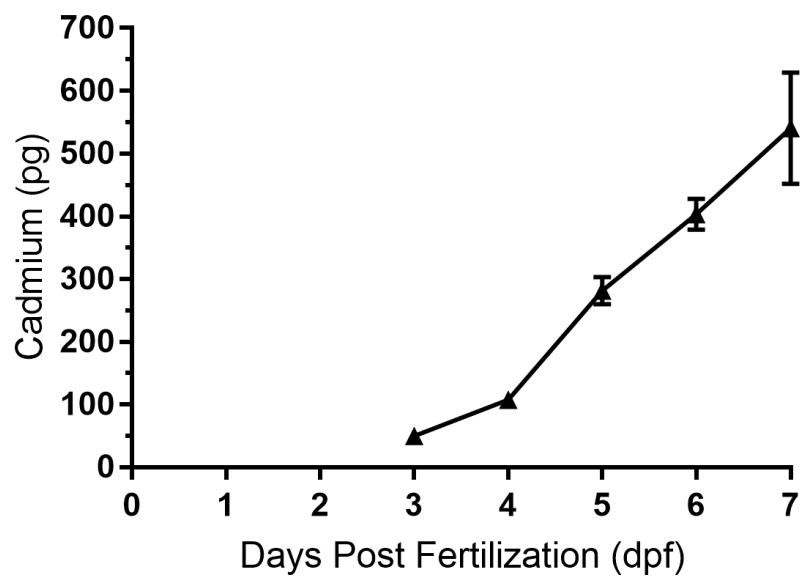

5 Figure 3

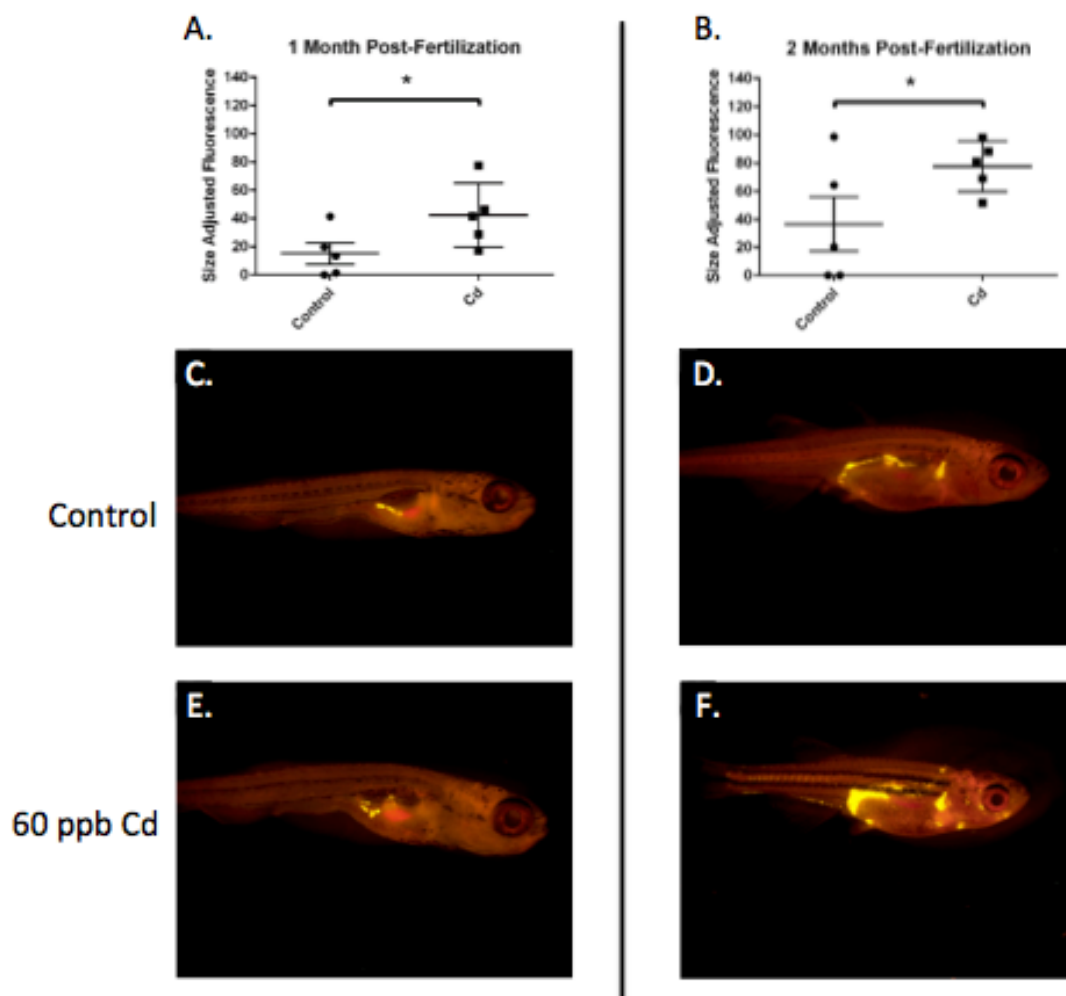

Source: https://www.biorxiv.org/content/10.1101/172346v1.full.pdf
